# Supplementary material for: Synthesis and structural characterization of a silver complex of a mixed-donor N-heterocyclic carbene linked cyclophane
Source: Royal Society of Chemistry journal article supplement (doi:10.1039/b105751k), 2001-01-01
Supplement: b105751k.doc [file b105751k.doc]

Supplementary Material

Synthesis of [1][PF6]2. 2,6-bis(imidazolmethyl)pyridine (4.79 g, 20.0 mmol) and 1-methyl-2,5-bis(trimethylaminomethyl)pyrrole diiodide (9.30 g, 20.0 mmol) were stirred in 300 mL of nitromethane and heated to 100 C for 3 days. The precipitate was filtered and dissolved in 300 mL of water and heated to 50 C overnight and filtered. Ammonium hexafluorophosphate (6.51 g, 40.0 mmol) was added to the filtrate and the precipitate was collected by filtration. The collected material was dissolved in acetonitrile and purified by alumina chromatography to obtain a white solid. Yield: 2.3 g, 3.6 mmol, 18%. mp: 190 C (dec). Anal. Calcd. for C20H22N6P2F12: C, 37.75; H, 3.48; N, 13.21. Found: C, 37.49; H, 3.46; N, 13.06.

Spectroscopic data for [1][PF6]2. 1H NMR (300 MHz, *d6*-DMSO):  2.99 (s, 3 H, CH3), 5.46 (m, 8 H, CH2), 6.46 (s, 2 H, C-H(pyrrole)), 7.62 (d, 2 H, J = 7.8 Hz, m-pyr), 7.72 (s, 2 H, N-C(H)-CH), 7.78 (s, 2 H, N-C(H)-CH), 7.97 (t, 1 H, J = 7.8 Hz, p-pyr), 8.60 (s, 2 H, N-C(H)-N). 13C{1H} NMR (75 MHz, *d6*-DMSO):  30.4 (CH3), 45.0 (CH2), 52.8 (CH2), 110.9 (CH-pyrrole), 123.0, 123.1, 123.6 (aromatic), 128.3 (C-pyrrole), 135.4 (N-C-N), 138.8 (p-pyr), 153.8 (C-pyr). ES-MS: m/z 491.1 (M+ of C20H22N6PF6). IR (Nujol, cm-1): 3668(s), 3595(m), 3150(vs), 3121(s), 3092(s), 2953(vs), 2854(vs), 2727(m), 2361(m), 2341(m), 1724(w), 1603(s), 1560(vs), 1458(vs), 1377(s), 1339(s), 1321(s), 1310(s), 1030(m), 999(m), 837(vs).

Synthesis of [Ag4(1*)2][PF6]4 (2). [1][PF6]2 (0.95 g, 1.5 mmol) and Ag2O (1.39 g, 6.0 mmol) were stirred in DMSO (25 mL) for 18 h at 55 C with exclusion of light, and filtered through celiteto give an orange solution. The solution was poured into water and filtered to give an off-white powder. Slow evaporation of a concentrated acetonitrile solution gave [Ag4(1*)2][PF6]4 (2)  2 DMSO as colorless crystals. Yield: 0.70 g, 0.39 mmol, 52 %. Anal. Calcd. for Ag4SOC44H52N12P4F24: C, 29.22; H, 2.90; N, 9.29. Found: C, 27.84; H, 2.72; N, 8.80.

Spectroscopic data for [Ag4(1*)2][PF6]4 (2): 1H NMR (300 MHz, *d6*-DMSO)  2.53 (s, 6 H, pyrrole-CH3), 5.43, 5.62, 5.64, 5.88 (d, 16 H, J = 15.6 Hz, methylenes), 6.02 (s, 4 H, pyrrole C-H), 7.90 (s, 4 H, N-C(H)-CH), ), 8.00 (s, 4 H, N-C(H)-CH), 8.03 (d, 4 H, J = 9 Hz, m-pyr), 8.36 (t, 2 H, J = 9 Hz, p-pyr). 13C{1H} NMR (75 MHz, *d6*-DMSO): 31.6 (CH3), 47.0 (CH2), 56.3 (CH2), 56.3 (CH2), 109.1, 124.7, 126.3, 129.1, 130.0, 141.6, 152.8 (Aromatic), 163.2 (dd, 1JC-Ag = 220 Hz, 1JC-Ag = 47 Hz, NCN). IR (Nujol, cm-1): 3171(m), 3150(m), 2922(vs), 2854(vs), 2729(vw), 2341(vw), 1884.3(vw), 1599(m), 1562(m), 1468(vs), 1439(vs), 1373(s), 1319(s), 1171(s), 1101(m), 995(vs), 945(vs), 833(vs).

**X-Ray Crystallography**. A colorless crystal of [Ag4(**1***)2][PF6]4 (**2**) *2 DMSO with dimensions 0.19 x 0.12 x 0.04 mm was coated in paraffin oil and mounted on a glass fiber and placed under a stream of nitrogen.[[1]](#endnote-2) All manipulations were carried out at 200 K using MoK (0.71073 Å) radiation on an Enraf-Nonius KappaCCD diffraction system. Unit cell parameters were obtained by indexing the peaks of the first 10 frames and refined using the entire data set. All frames were integrated and corrected for Lorentz and polarization effects using DENZO.[[2]](#endnote-3) The structure of **2** was solved by direct methods.[[3]](#endnote-4) One of the PF6 anions was determined to be disordered and the modeling of the disorder consisted of assigning the phosphorus and two flourine atoms at full occupancy and eight additional flourine atoms located equatorial at ½ occupancy. Arene and alkyl hydrogen atoms were placed in idealized positions and refined using a riding model. Compound **2** was refined to convergence using anisotropic thermal parameters for all non-hydrogen atoms.

1. . Hope, H. In *Experimental Organometallic Chemistry*; Wayda, A. L., Darensbourg, M.Y., Eds.; ACS Symposium Series 357; American Chemical Society: Washington, DC, 1987, Chapter 10. [↑](#endnote-ref-2)
2. . Otwinowsky, Z.; Minor, W. In *Methods in Enzymology*, Vol. 276: *Macromolecular Crystallography*, part A; Carter, C. W., Jr., ;Sweet, R. M., Eds.; Academic Press: New York, 1997; pp 307-326. [↑](#endnote-ref-3)
3. . SHELXTL, Version 5.11; Siemens Analytical Instruments: Madison, WI, 1997. [↑](#endnote-ref-4)
